# Supplementary material
Source: PubMed Central journal article supplement (PMC4298180)

## Supporting Information

### Phenotypic diversity in domestic mammals does not result from an increased recombination rate

Muñoz-Fuentes, V.; Marcé-Ortega, M.; Alkorta-Aranburu, G.; Linde-Forsberg, C.; Morrell, J. M.; Manzano, E.; Södeberg, A.; Daniel, K.; Villalba, A.; Toth, A.; Di Rienzo, A.; Roig, I.; Vilà, C.

This section contains: **Supporting Figures**  
**Supporting Tables**

#### Supporting Figure Legends

**Figure S1. MLH1 foci counts for all samples.** Graphs display MLH1 counts for all individuals analyzed: dogs and wolves (green and red, respectively, A), goats and ibexes (green and red, respectively, B) and sheep and mouflons (green and red, respectively, C). Black lines represent the average found in each sample (A-C).

**Figure S2. LD patterns in dogs and wolves for each of the regions studied.** Values of  $r^2$  as a measure of pairwise LD between SNPs. Wolf genotype data was thinned to match the dog data by selecting the SNP with the same or the closest coordinates to each dog SNP. LDhat maps, based on the inference of population recombination rate ( $\rho$ ), for the same markers, are plotted above each LD plot.

**Figure S3. Genetic maps for the 16 genomic regions studied for dogs and wolves.** Mean  $\rho = 4N_e r$  estimates along each fragment (penalty 5). Each dot represents the value of  $\rho$  between each pair of SNPs. The colour of the dot indicates whether the SNP is found in an intergenic region (green), an intron (pink) or an exon (blue, synonymous change; red, non-synonymous change). The red line represents the location of the locus associated with the phenotypic character (see Table 1). The dashed line is the average recombination rate for the region.

## **Supporting Table Legends**

**Table S1** Approaches and samples used in this study to compare recombination between wild and domestic species.

**Table S2** Number of observed segregating sites and estimated number of recombination breakpoints in the 16 genomic regions studied in dogs and wolves.

## Supporting Tables

**Table S1** Approaches and samples used in this study to compare recombination between wild and domestic species

| <b>Approach</b>         | <b>Species</b>                       | <b>Common name</b>      | <b>Origin</b>           | <b>Sample ID</b>  |         |
|-------------------------|--------------------------------------|-------------------------|-------------------------|-------------------|---------|
| MLH1 mapping            | <i>Canis familiaris</i>              | Dog                     | Veterinary clinic       | CaFa31            |         |
|                         | <i>Canis familiaris</i>              | Dog                     | Veterinary clinic       | CaFa32            |         |
|                         | <i>Canis familiaris</i>              | Dog                     | Veterinary clinic       | CaFa33            |         |
|                         | <i>Canis familiaris</i>              | Dog                     | Veterinary clinic       | CaFa34            |         |
|                         | <i>Canis familiaris</i>              | Dog                     | Veterinary clinic       | CaFa38            |         |
|                         | <i>Canis familiaris</i>              | Dog                     | Veterinary clinic       | CaFa39            |         |
|                         | <i>Canis lupus</i>                   | Wolf                    | Madrid Zoo              | Z/LG8             |         |
|                         | <i>Canis lupus</i>                   | Wolf                    | Madrid Zoo              | Z/LG7             |         |
|                         | <i>Capra hircus</i>                  | Goat                    | Pilas                   | CaHir1            |         |
|                         | <i>Capra hircus</i>                  | Goat                    | Pilas                   | CaHir2            |         |
|                         | <i>Capra hircus</i>                  | Goat                    | Pilas                   | CaHir3            |         |
|                         | <i>Capra hircus</i>                  | Goat                    | Pilas                   | CaHir4            |         |
|                         | <i>Capra hircus</i>                  | Goat                    | Pilas                   | CaHir5            |         |
|                         | <i>Capra hircus</i>                  | Goat                    | Pilas                   | CaHir6            |         |
|                         | <i>Capra pyrenaica</i>               | Spanish ibex            | Cazorla                 | CaPyr1            |         |
|                         | <i>Capra pyrenaica</i>               | Spanish ibex            | Cazorla                 | CaPyr4            |         |
|                         | <i>Capra pyrenaica</i>               | Spanish ibex            | Cazorla                 | CaPyr5            |         |
|                         | <i>Capra pyrenaica</i>               | Spanish ibex            | Cazorla                 | CaPyr6            |         |
|                         | <i>Capra pyrenaica</i>               | Spanish ibex            | Cazorla                 | CaPyr7            |         |
|                         | <i>Capra pyrenaica</i>               | Spanish ibex            | Cazorla                 | CaPyr8            |         |
|                         | <i>Ovis aries</i>                    | Sheep                   | Los Corrales            | OvAri1            |         |
|                         | <i>Ovis aries</i>                    | Sheep                   | Los Corrales            | OvAri3            |         |
|                         | <i>Ovis aries</i>                    | Sheep                   | Los Corrales            | OvAri4            |         |
|                         | <i>Ovis aries</i>                    | Sheep                   | Los Corrales            | OvAri5            |         |
|                         | <i>Ovis aries</i>                    | Sheep                   | Los Corrales            | OvAri6            |         |
|                         | <i>Ovis aries</i>                    | Sheep                   | Pilas                   | OvAri8            |         |
|                         | <i>Ovis musimon</i>                  | Mouflon                 | Cazorla                 | OvMus6            |         |
|                         | <i>Ovis musimon</i>                  | Mouflon                 | Cazalla de la Sierra    | OvMus11           |         |
|                         | <i>Ovis musimon</i>                  | Mouflon                 | Cazalla de la Sierra    | OvMus13           |         |
|                         | <i>Ovis musimon</i>                  | Mouflon                 | Cazalla de la Sierra    | OvMus14           |         |
|                         | <i>Ovis musimon</i>                  | Mouflon                 | Cazalla de la Sierra    | OvMus15           |         |
|                         | Population genomics on sequence data | <i>Canis familiaris</i> | Dog                     | Veterinary clinic | CaFa1Sp |
|                         |                                      | <i>Canis familiaris</i> | Dog                     | Veterinary clinic | CaFa2Sp |
| <i>Canis familiaris</i> |                                      | Dog                     | Veterinary clinic       | CaFa5Sp           |         |
| <i>Canis familiaris</i> |                                      | Dog                     | Veterinary clinic       | CaFa8Sp           |         |
| <i>Canis familiaris</i> |                                      | Dog                     | Veterinary clinic       | CaFa9Sp           |         |
| <i>Canis lupus</i>      |                                      | Wolf                    | United States (captive) | 465B1             |         |
| <i>Canis lupus</i>      |                                      | Wolf                    | United States (captive) | 475B1             |         |

|                    |      |                           |             |
|--------------------|------|---------------------------|-------------|
| <i>Canis lupus</i> | Wolf | Spain                     | CaLu3M      |
| <i>Canis lupus</i> | Wolf | Spain                     | CaLu8M      |
| <i>Canis lupus</i> | Wolf | Spain                     | CaLu9M      |
| <i>Canis lupus</i> | Wolf | Spain                     | CaLu10M     |
| <i>Canis lupus</i> | Wolf | Sweden                    | CaLu4M      |
| <i>Canis lupus</i> | Wolf | Sweden                    | CaLu5M      |
| <i>Canis lupus</i> | Wolf | Sweden                    | CaLu6M      |
| <i>Canis lupus</i> | Wolf | Sweden                    | CaLu7M      |
| <i>Canis lupus</i> | Wolf | Finland                   | FIN7462     |
| <i>Canis lupus</i> | Wolf | Finland                   | FIN7760     |
| <i>Canis lupus</i> | Wolf | Finland                   | FIN8174     |
| <i>Canis lupus</i> | Wolf | Italy                     | IT001       |
| <i>Canis lupus</i> | Wolf | Italy                     | IT050       |
| <i>Canis lupus</i> | Wolf | Italy                     | IT973       |
| <i>Canis lupus</i> | Wolf | North Western Territories | NRS2010.005 |
| <i>Canis lupus</i> | Wolf | North Western Territories | NRS2010.016 |
| <i>Canis lupus</i> | Wolf | North Western Territories | NRS2010.021 |
| <i>Canis lupus</i> | Wolf | British Columbia          | ex111       |
| <i>Canis lupus</i> | Wolf | British Columbia          | ex112       |

---

**Table S2** Number of observed segregating sites and estimated number of recombination breakpoints in the 16 genomic regions studied in dogs and wolves.

| chr        | Dogs        |             | Spain + Italy wolves |             | Sweden+Finland wolves |             | North American wolves |             |
|------------|-------------|-------------|----------------------|-------------|-----------------------|-------------|-----------------------|-------------|
|            | Segr. Sites | Breakpoints | Segr. Sites          | Breakpoints | Segr. Sites           | Breakpoints | Segr. Sites           | Breakpoints |
| <b>1</b>   | 247         | 9           | 268                  | 7           | 324                   | 0           | 353                   | 17          |
| <b>9</b>   | 198         | 9           | 392                  | 16          | 402                   | 11          | 388                   | 10          |
| <b>10</b>  | 46          | 2           | 72                   | 2           | 92                    | 1           | 290                   | 4           |
| <b>12</b>  | 485         | 25          | 563                  | 23          | 642                   | 19          | 854                   | 33          |
| <b>13</b>  | 494         | 11          | 481                  | 11          | 606                   | 31          | 748                   | 31          |
| <b>15</b>  | 196         | 9           | 262                  | 15          | 285                   | 9           | 447                   | 18          |
| <b>16a</b> | 283         | 13          | 474                  | 15          | 396                   | 12          | 471                   | 20          |
| <b>16b</b> | 928         | 51          | 907                  | 42          | 1181                  | 66          | 1255                  | 71          |
| <b>17</b>  | 435         | 28          | 485                  | 28          | 503                   | 17          | 598                   | 38          |
| <b>18a</b> | 313         | 10          | 462                  | 17          | 544                   | 26          | 531                   | 30          |
| <b>18b</b> | 937         | 44          | 1197                 | 59          | 1212                  | 66          | 1246                  | 54          |
| <b>20</b>  | 459         | 20          | 745                  | 51          | 723                   | 38          | 744                   | 39          |
| <b>22</b>  | 349         | 19          | 441                  | 18          | 553                   | 29          | 640                   | 33          |
| <b>25</b>  | 613         | 37          | 830                  | 36          | 858                   | 34          | 1144                  | 55          |
| <b>27</b>  | 770         | 40          | 1084                 | 48          | 1159                  | 61          | 1445                  | 87          |
| <b>32</b>  | 286         | 16          | 471                  | 19          | 395                   | 15          | 572                   | 32          |

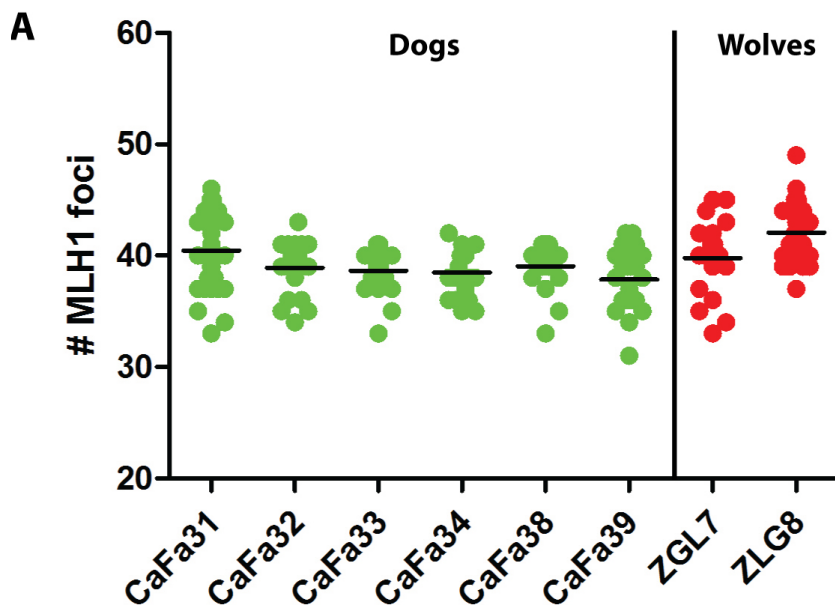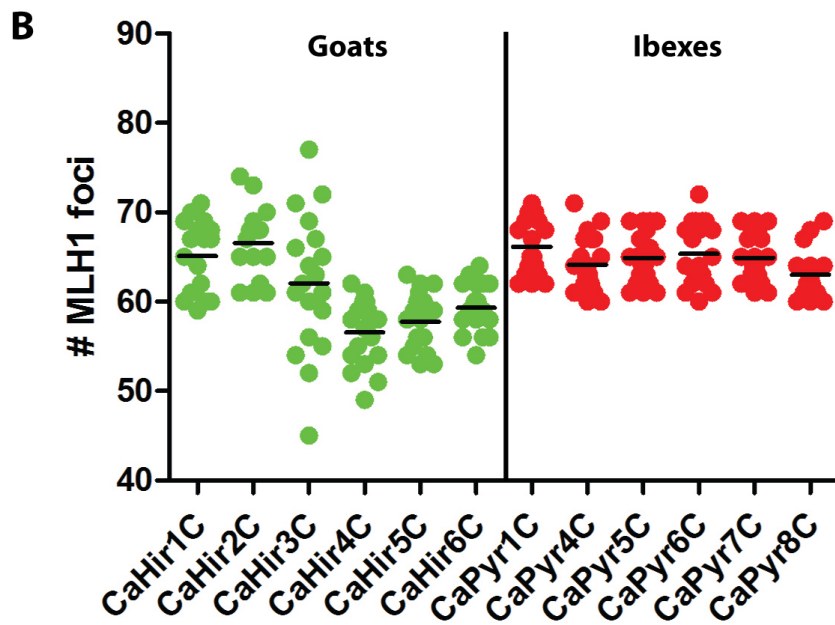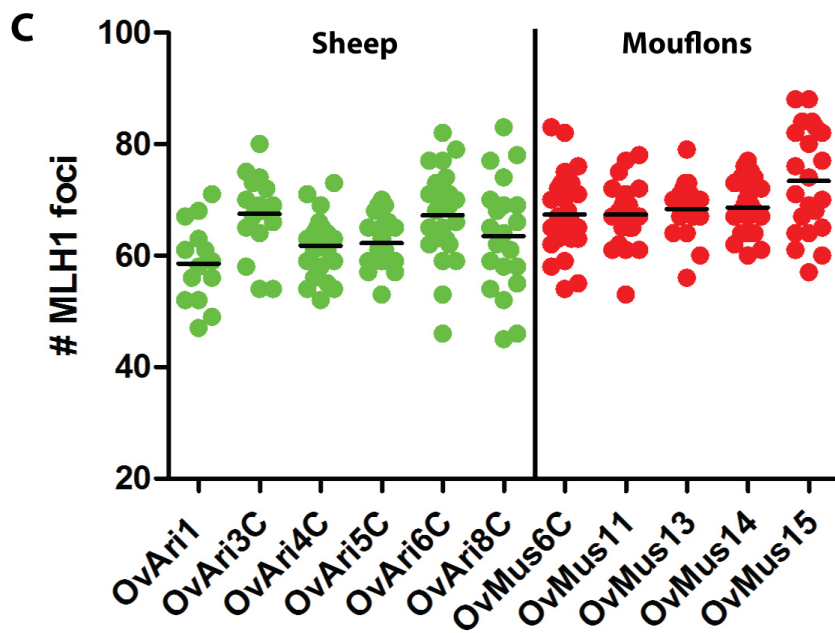

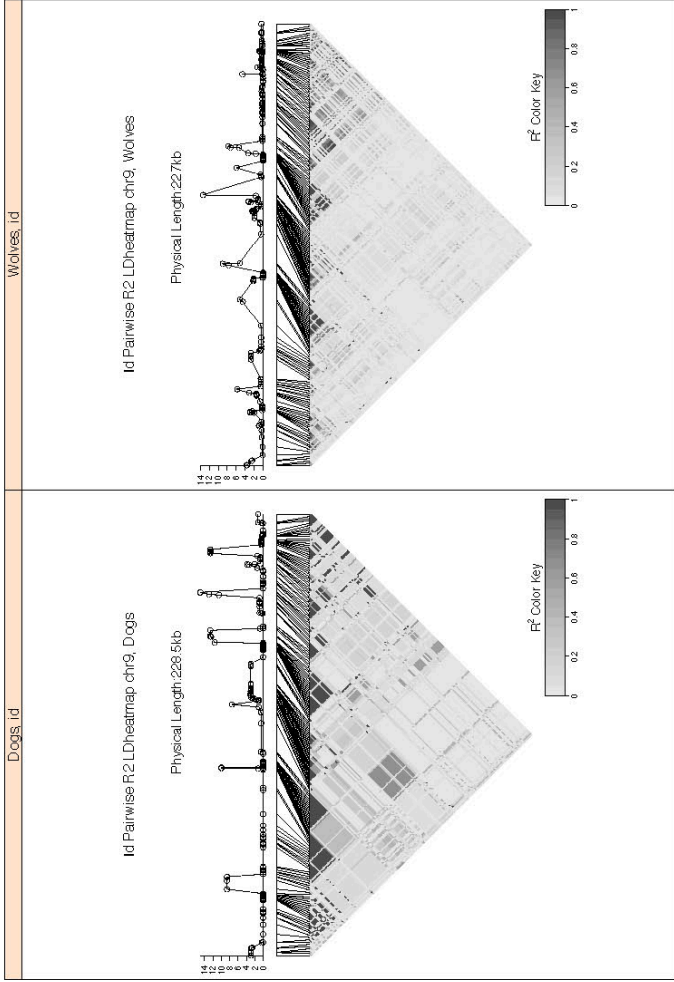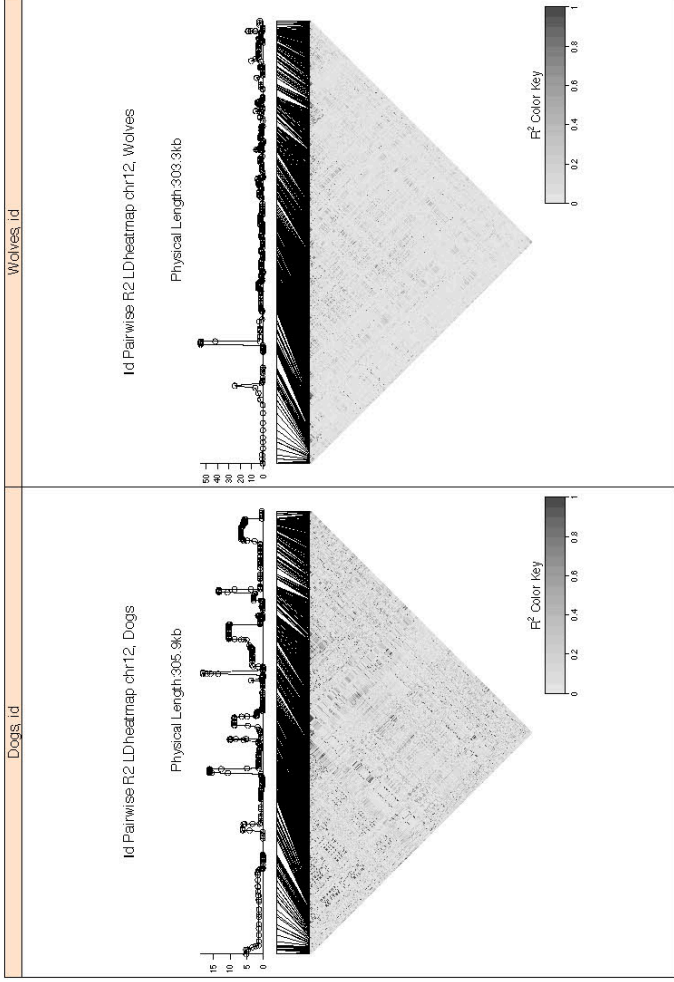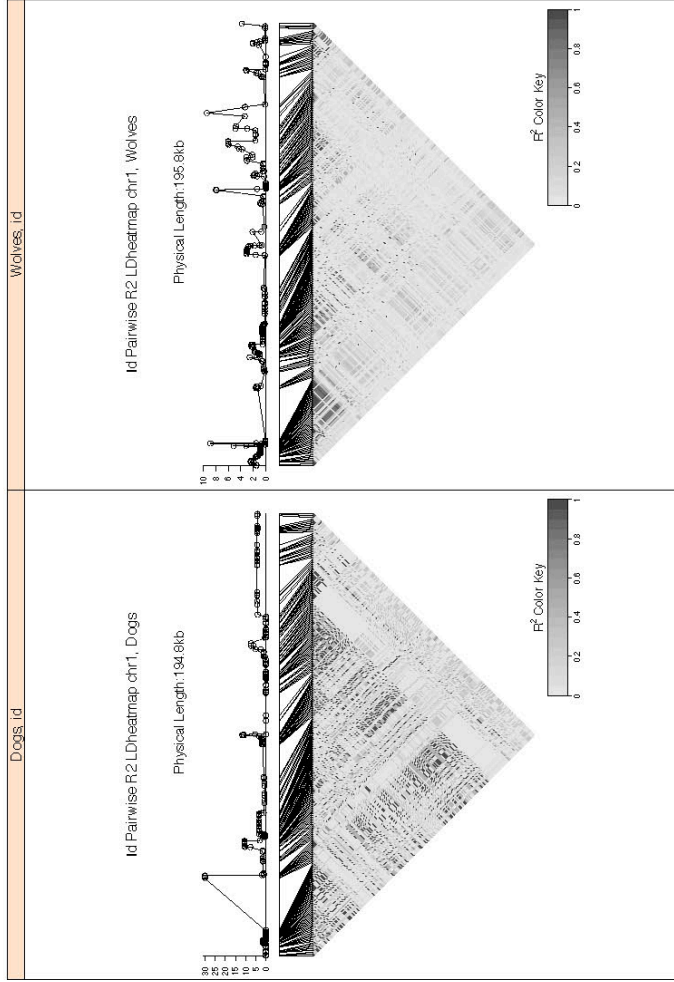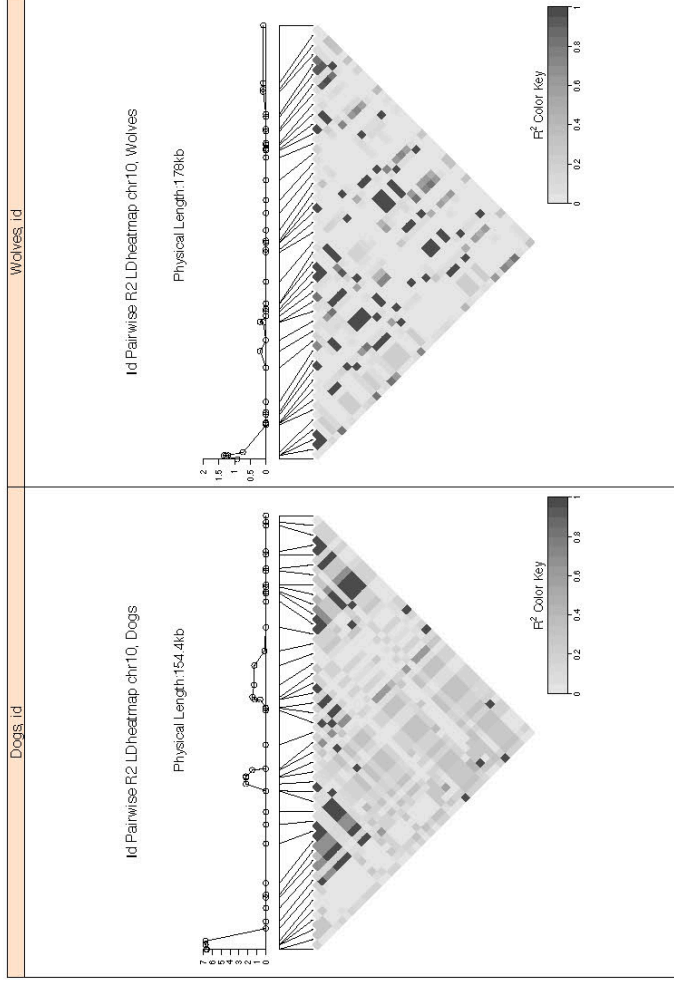

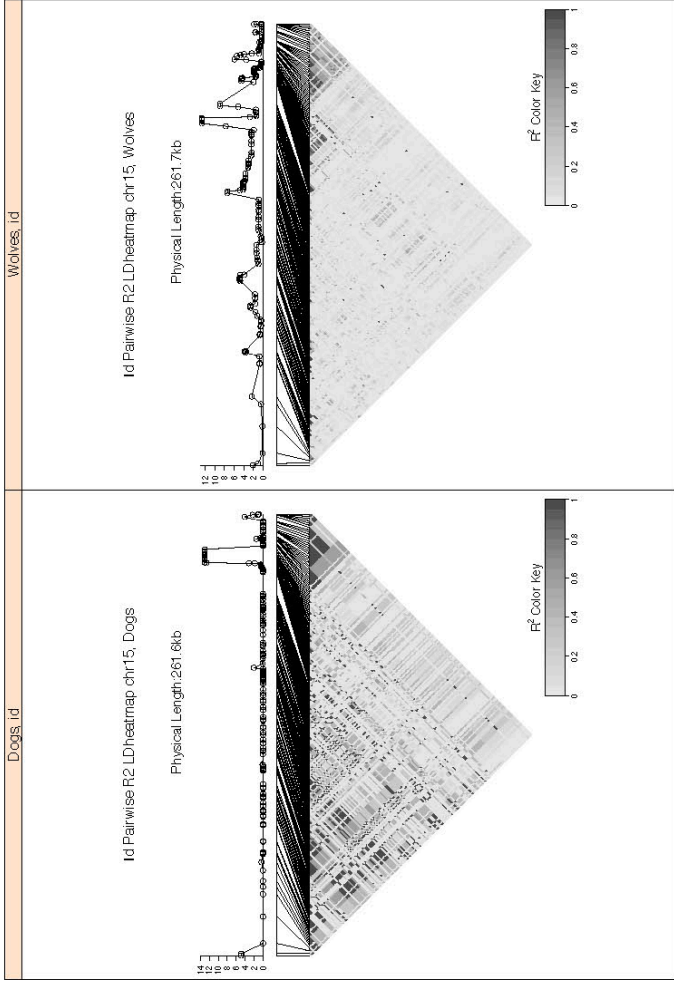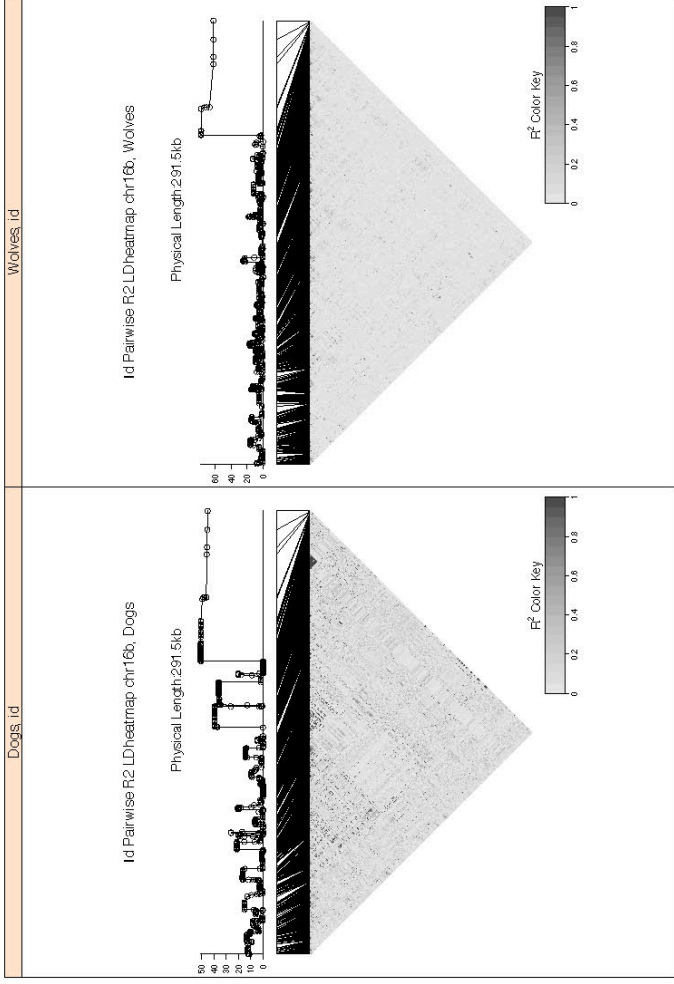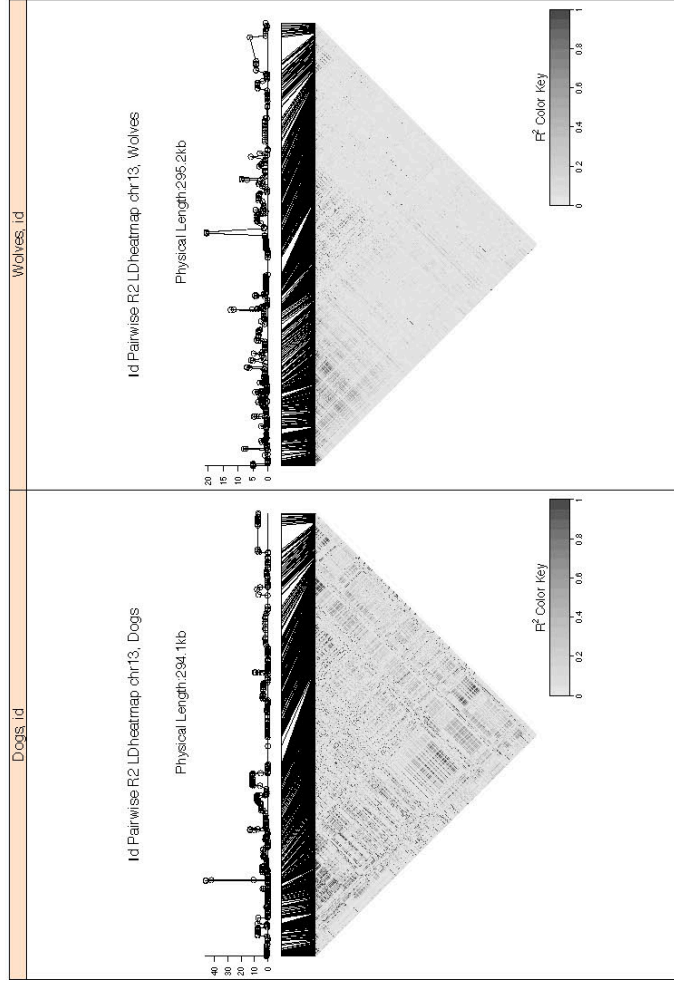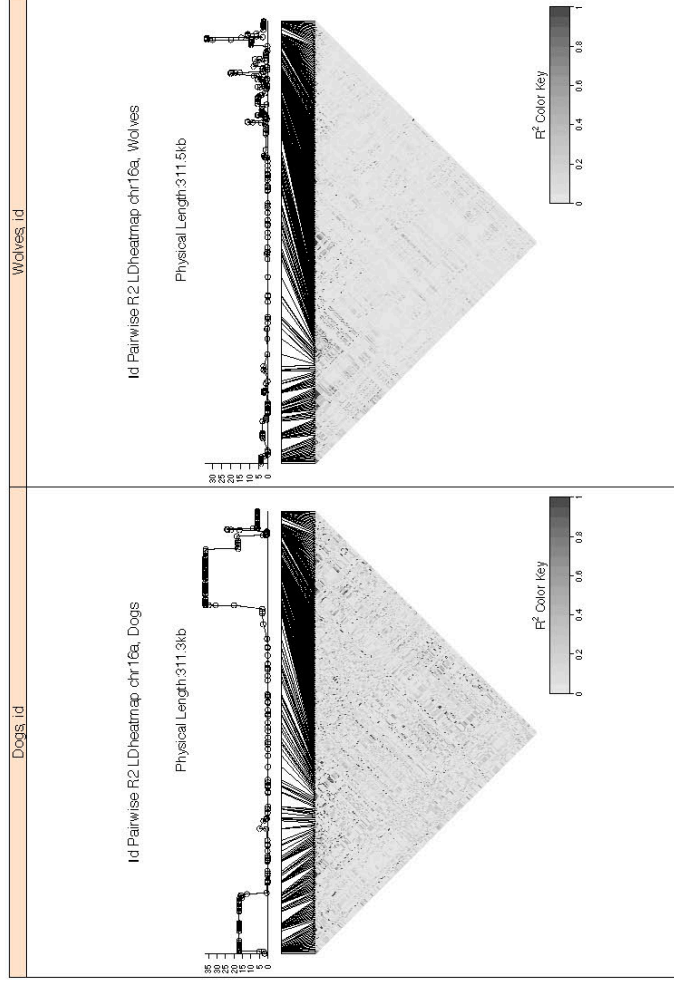



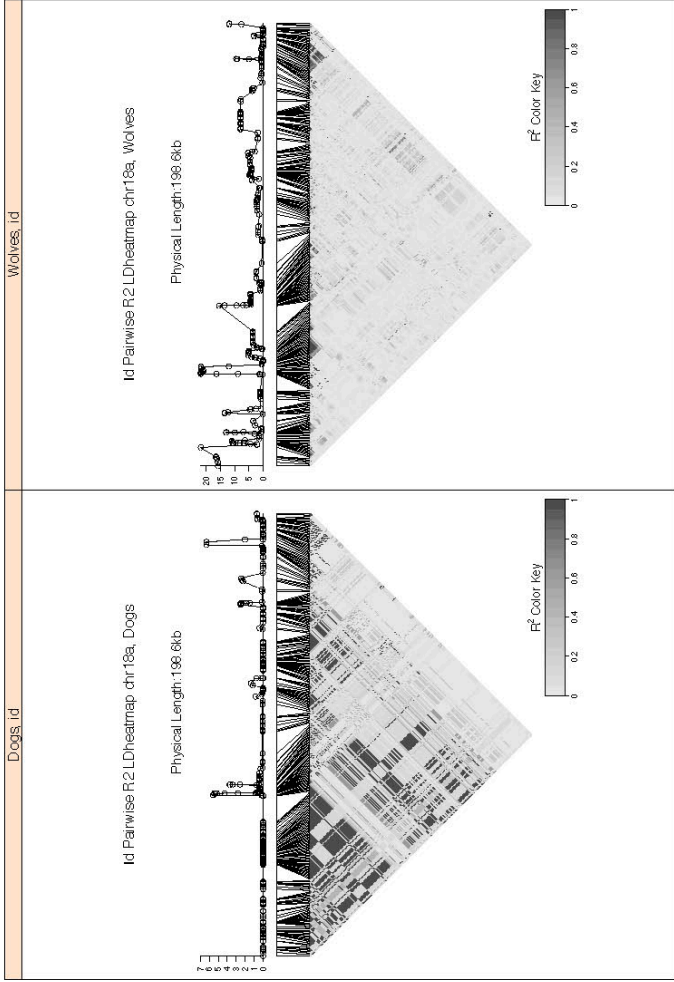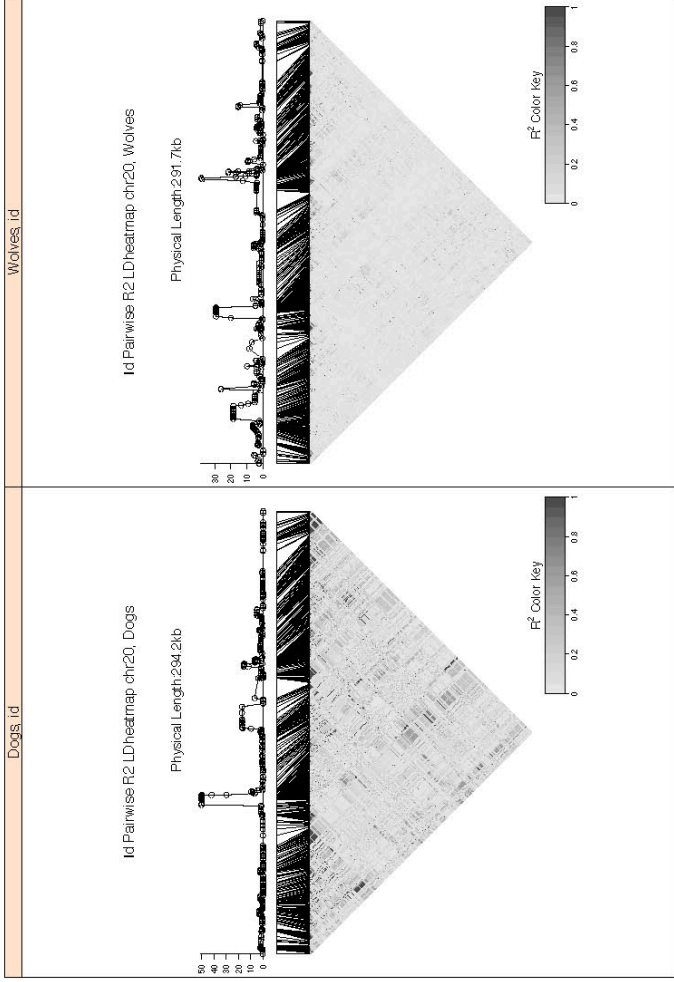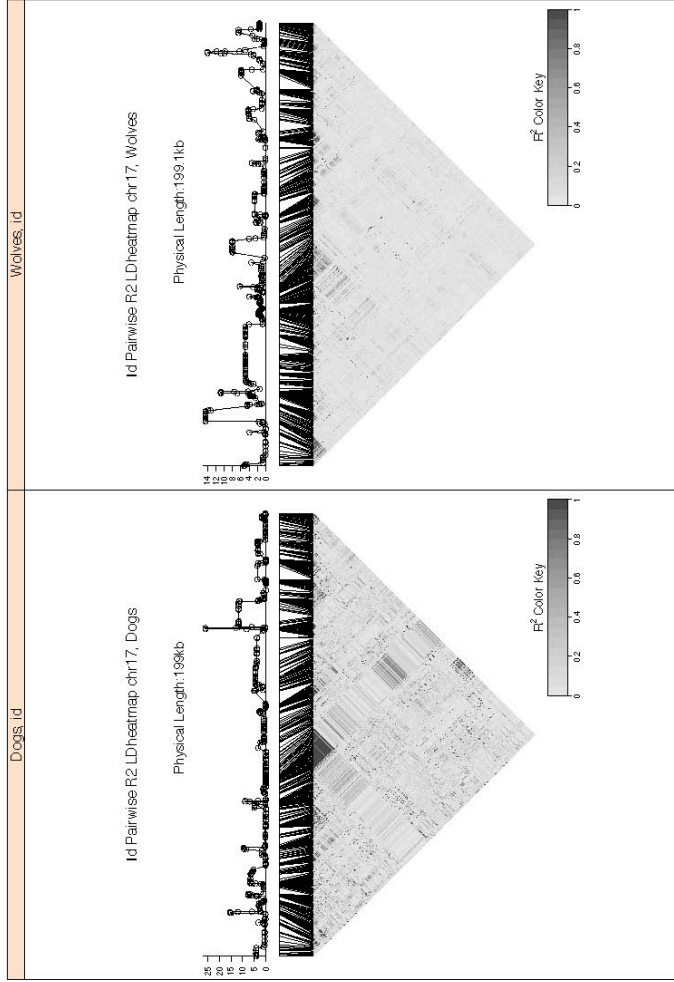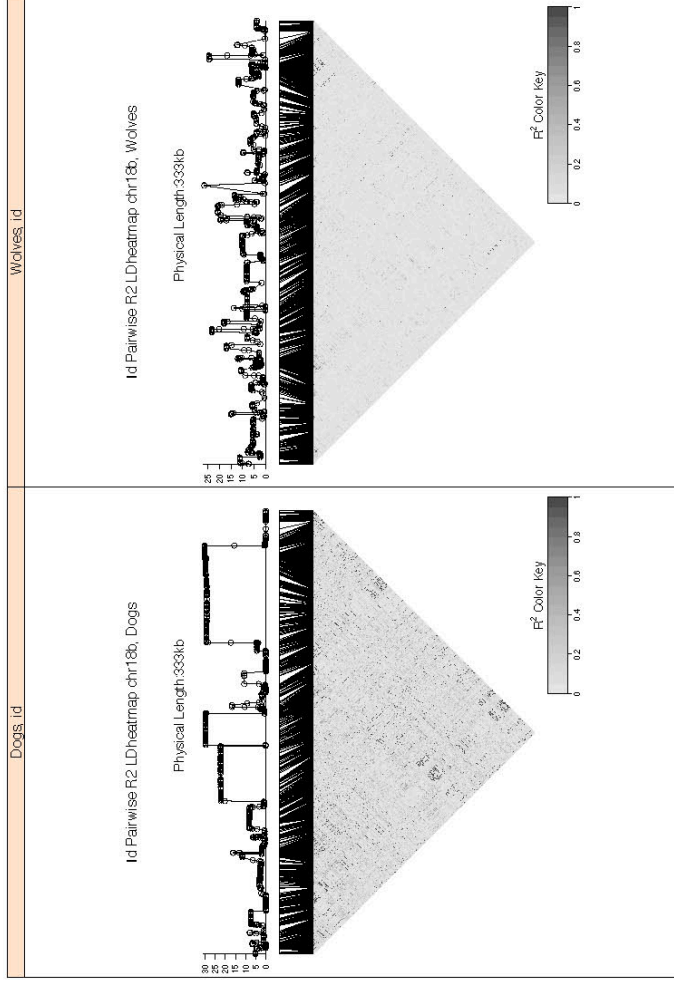

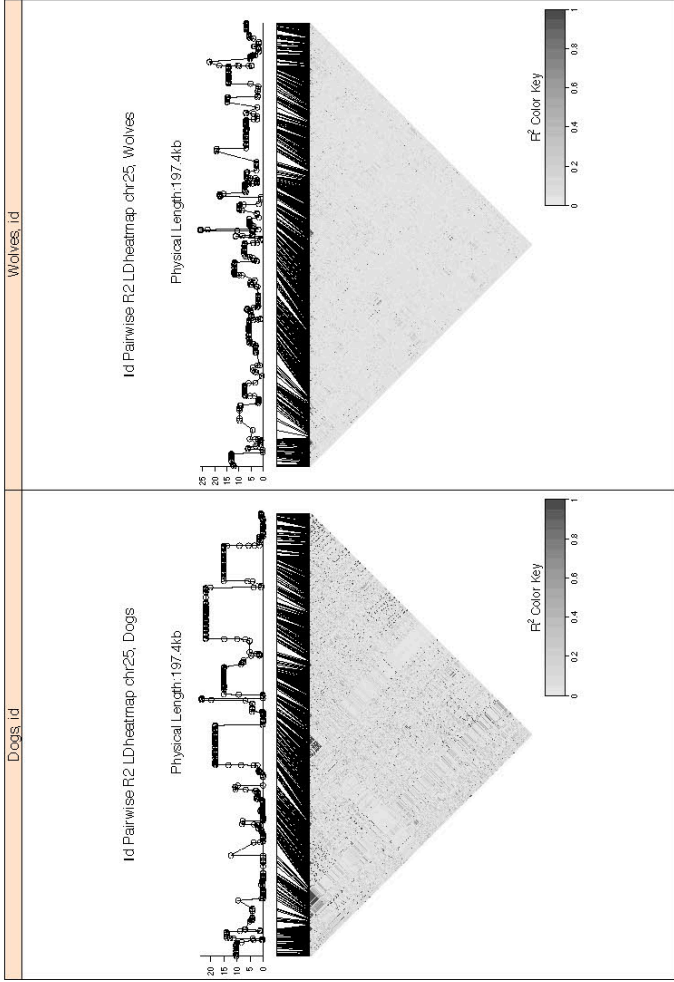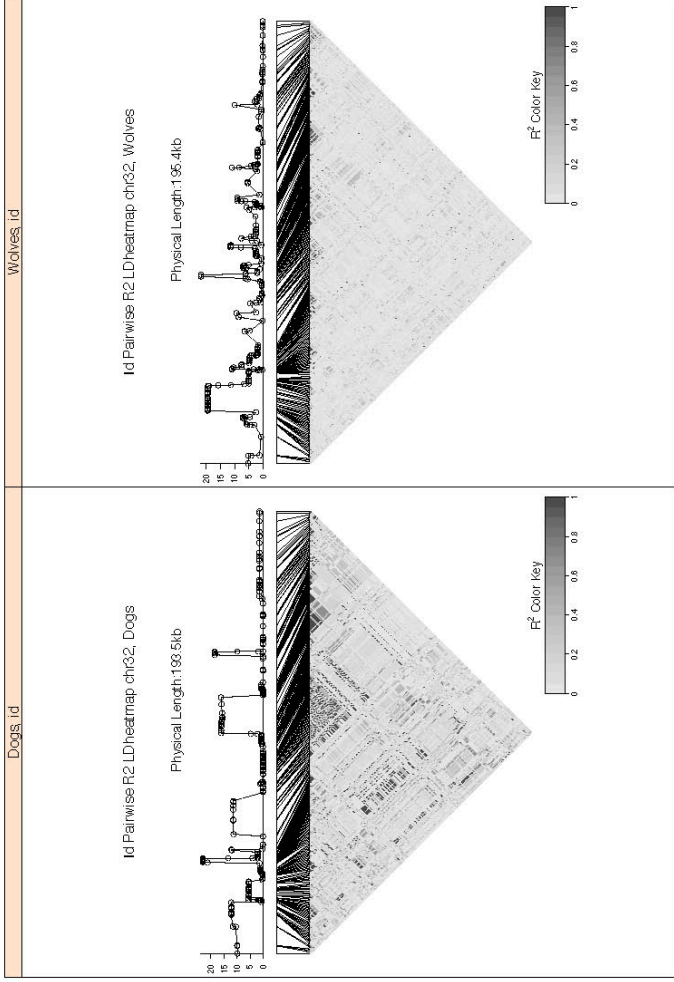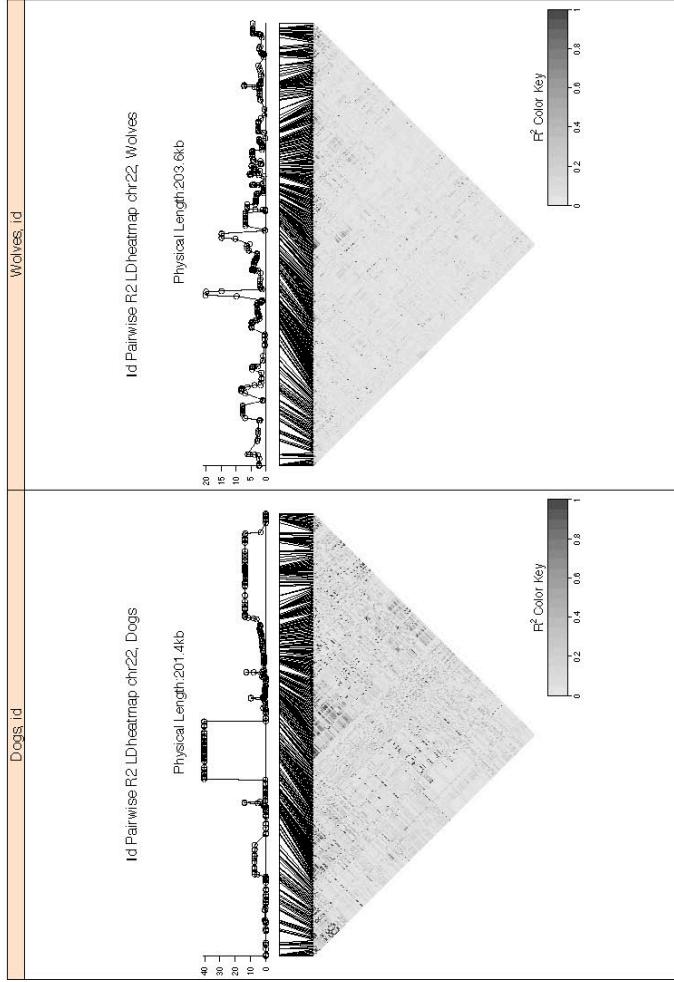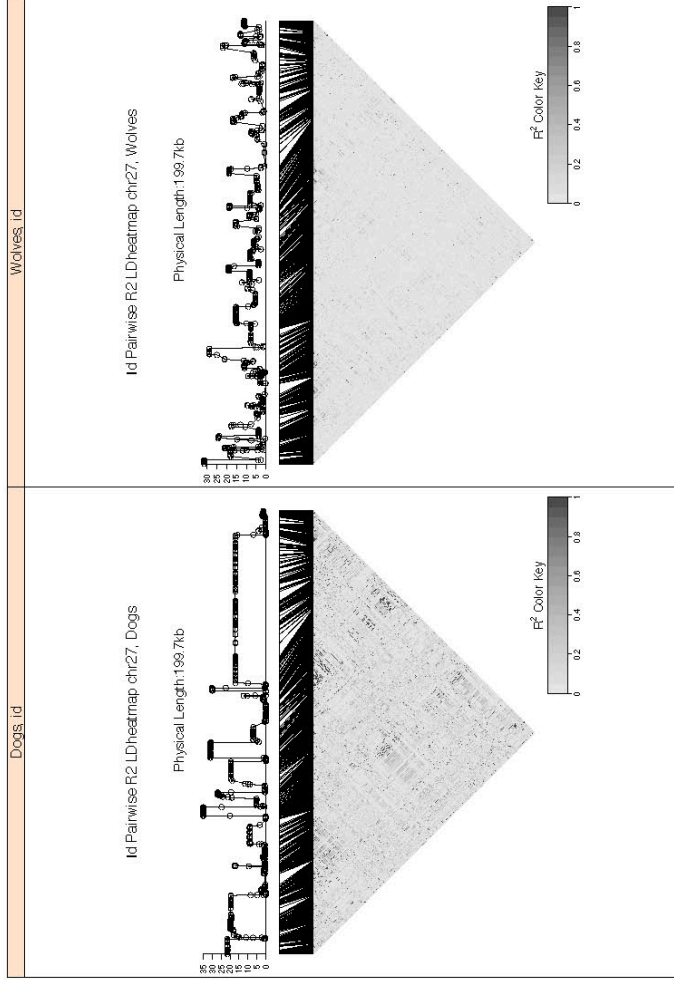

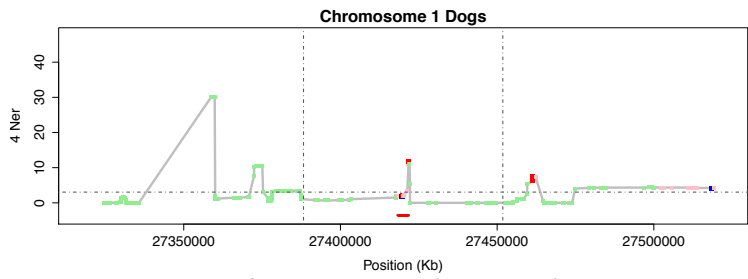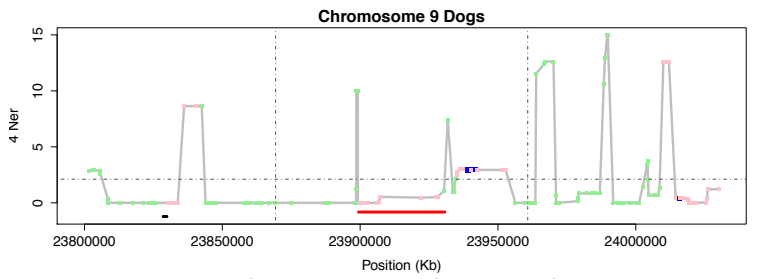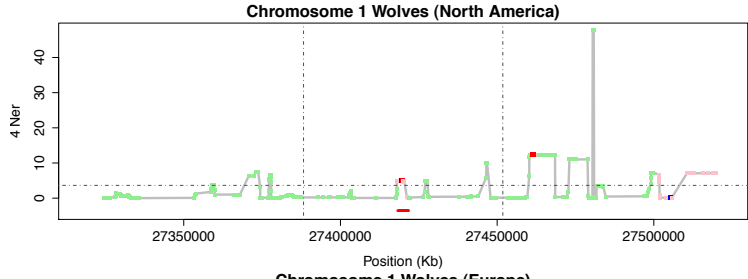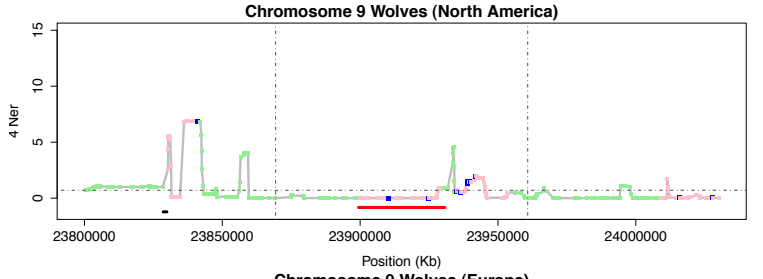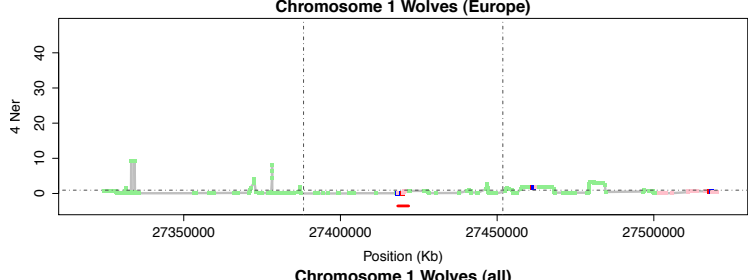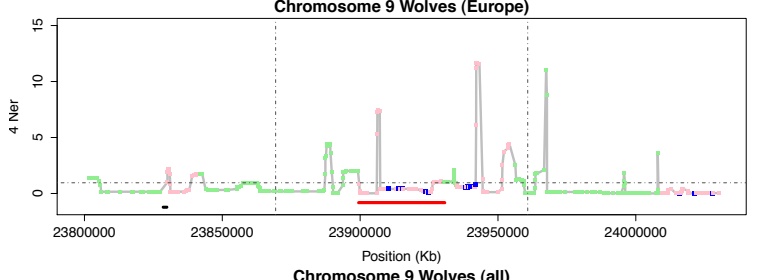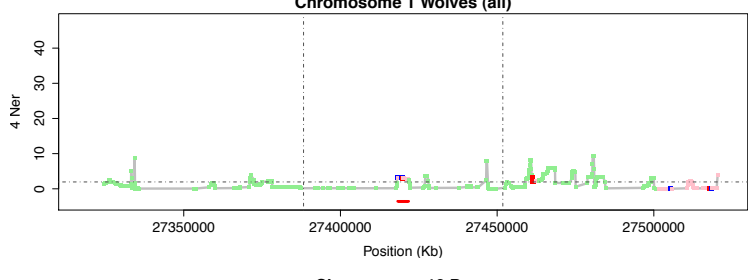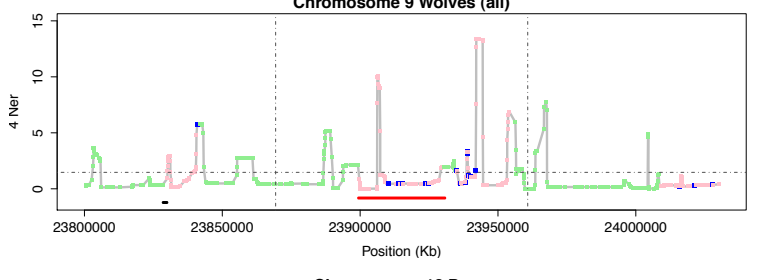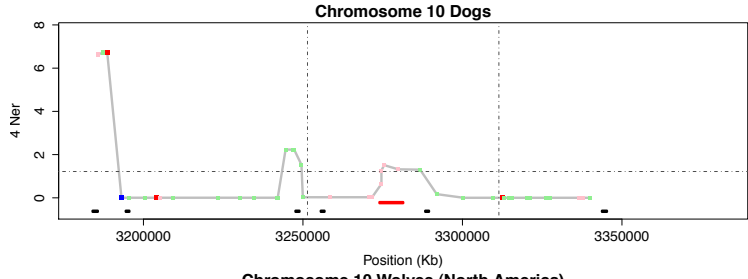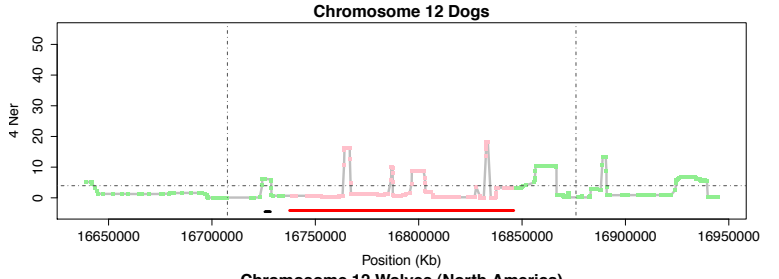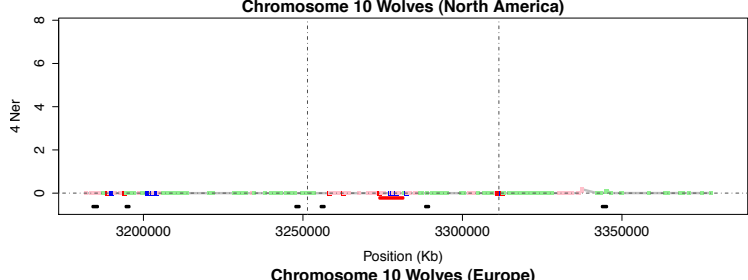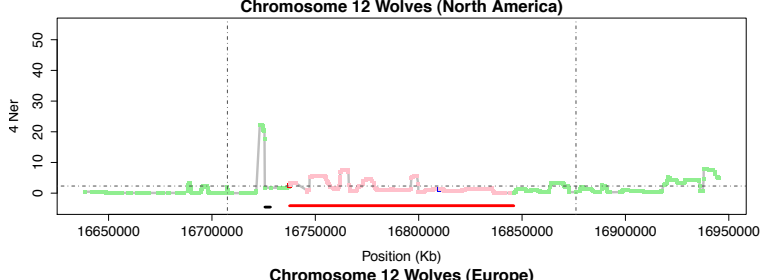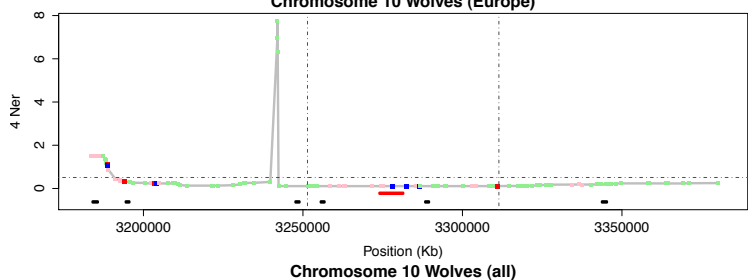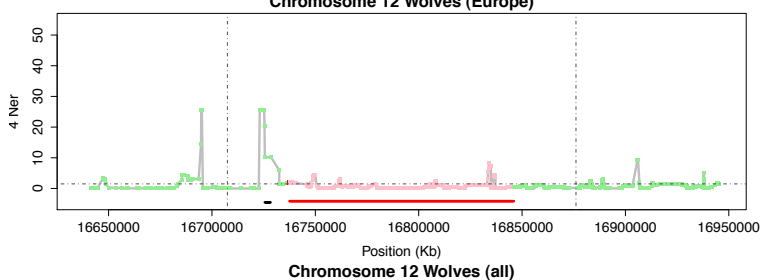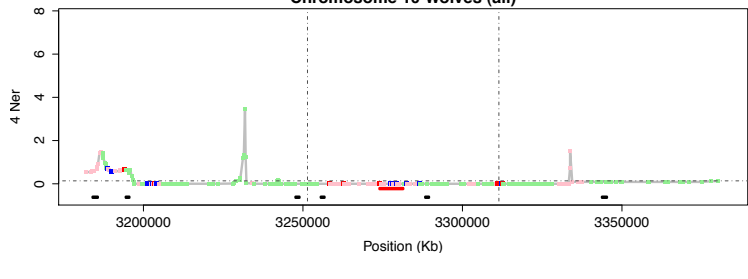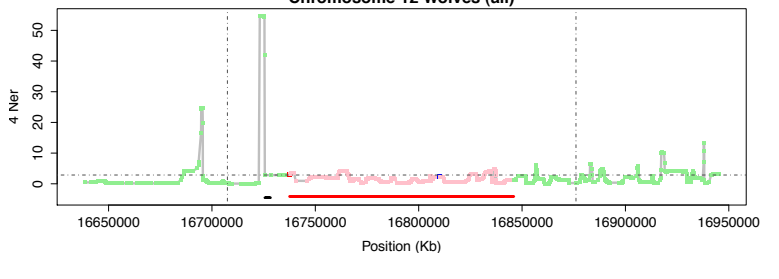

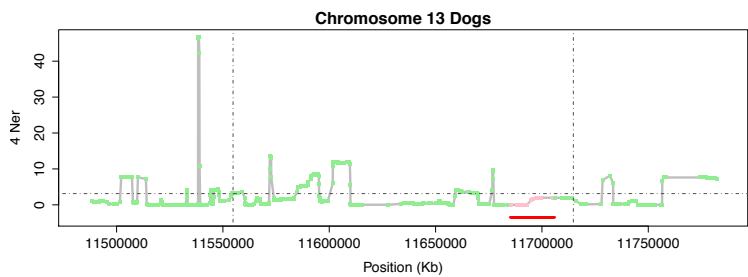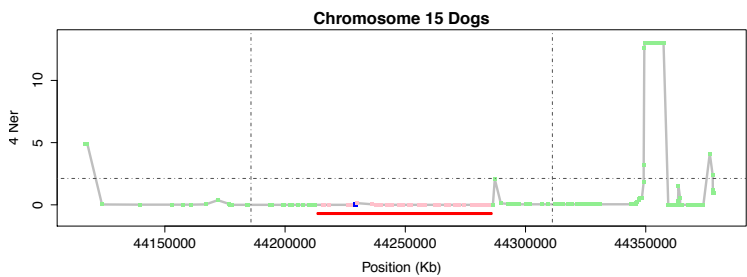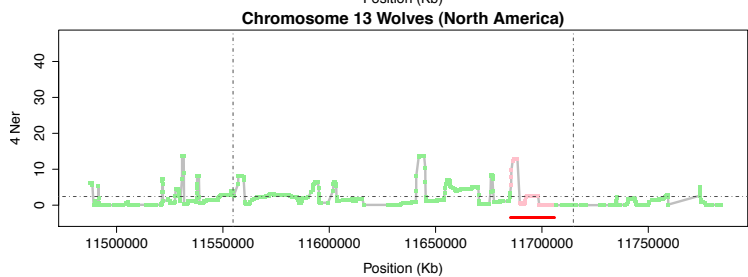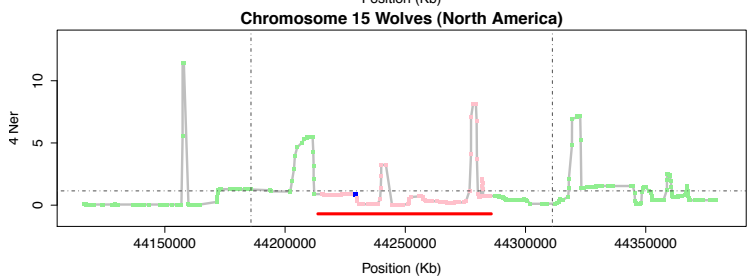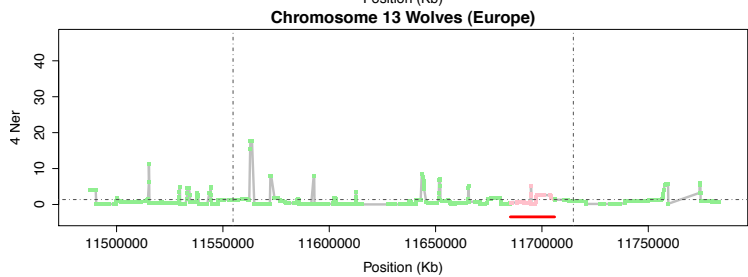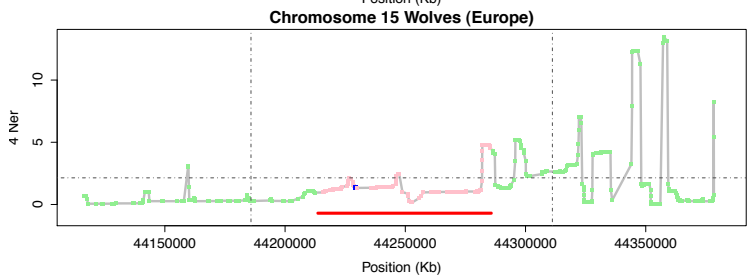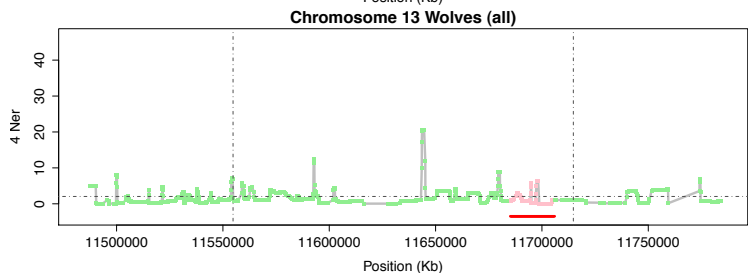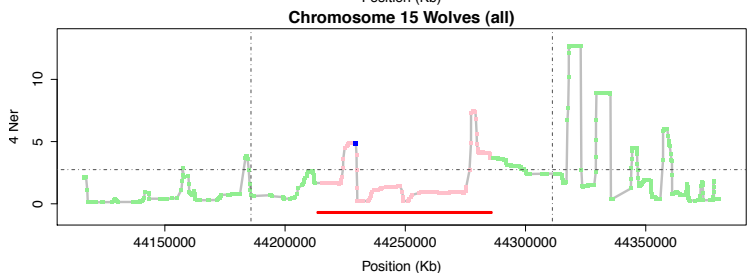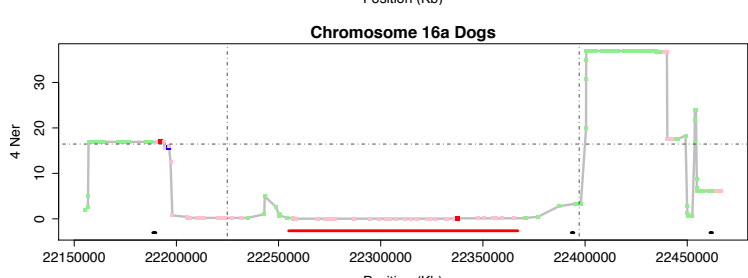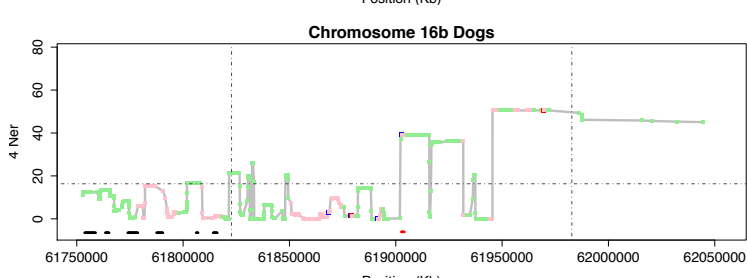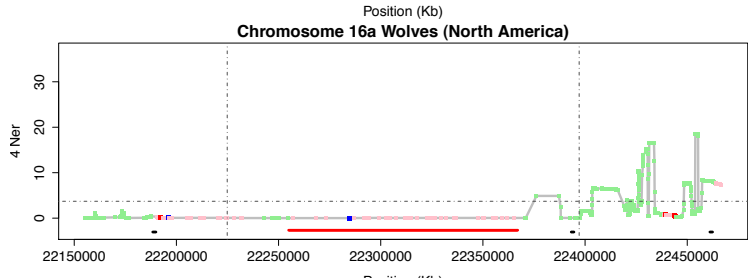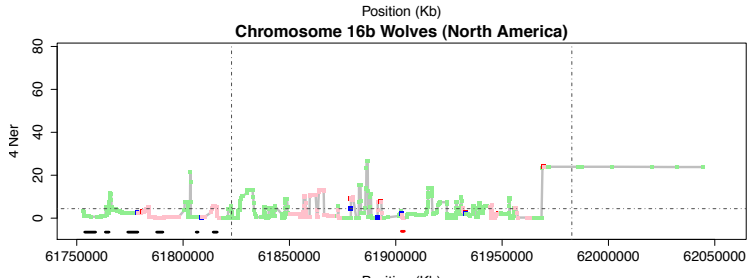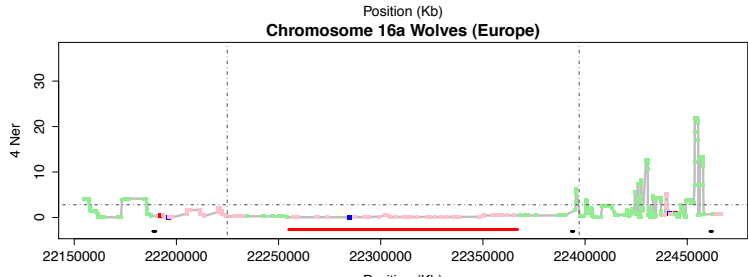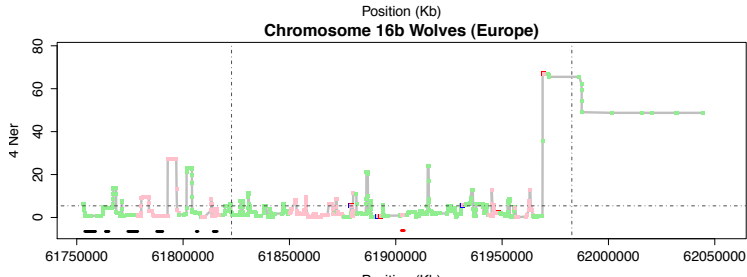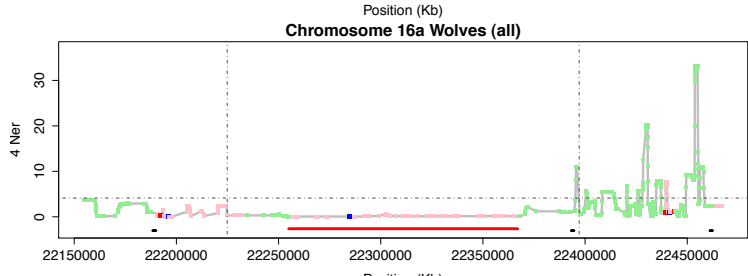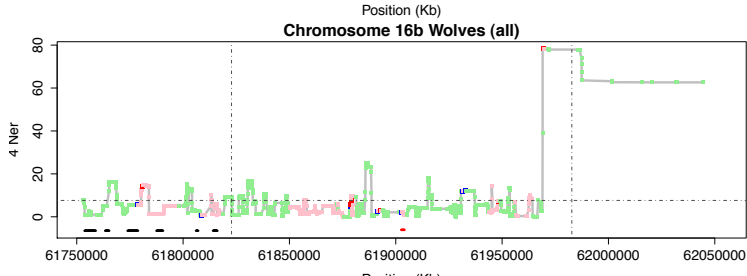

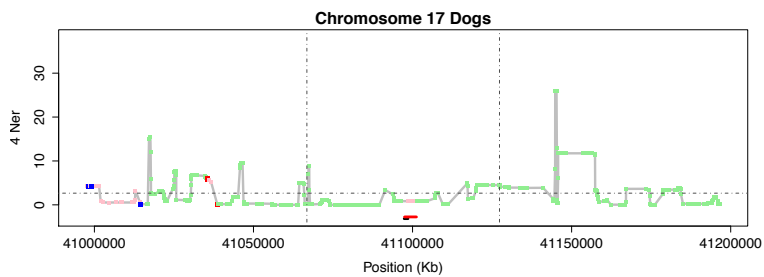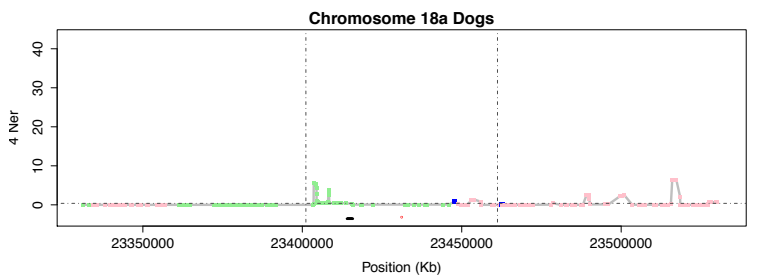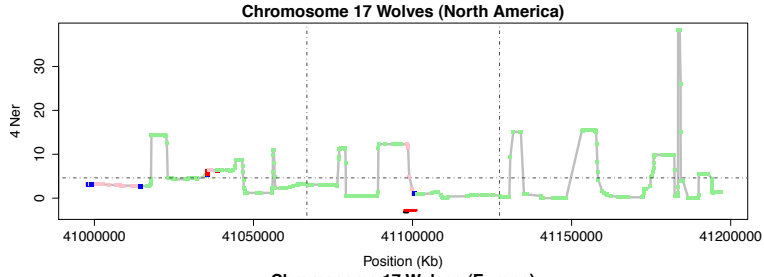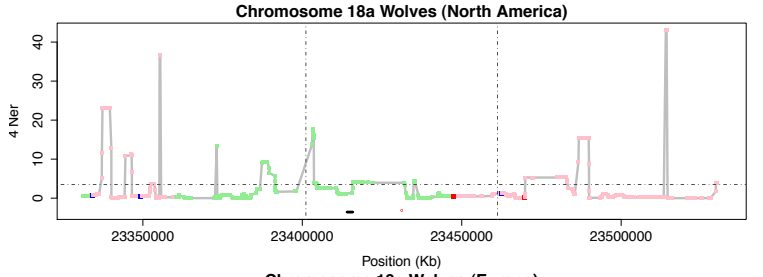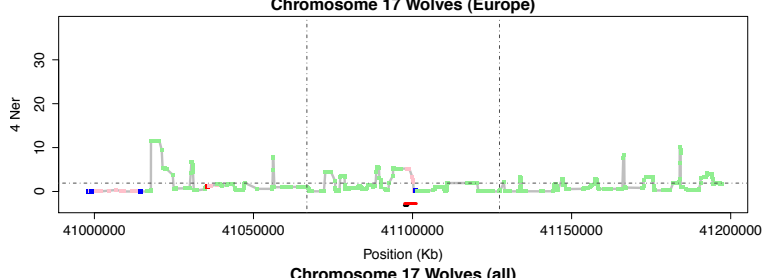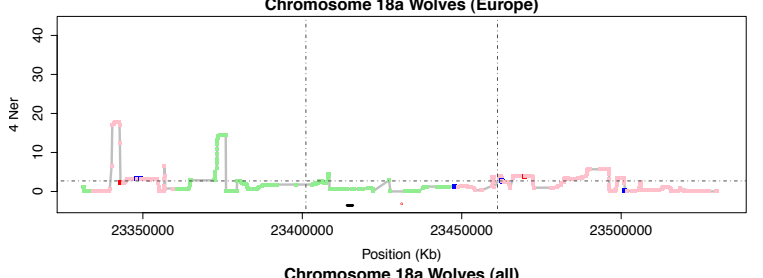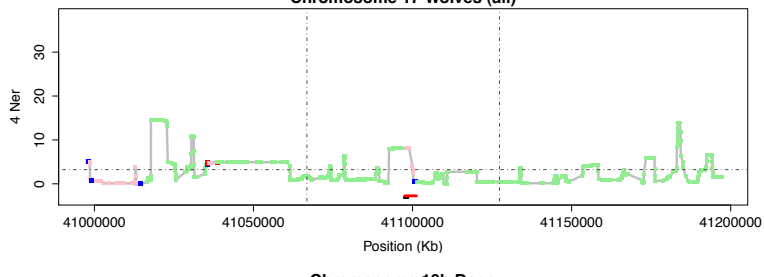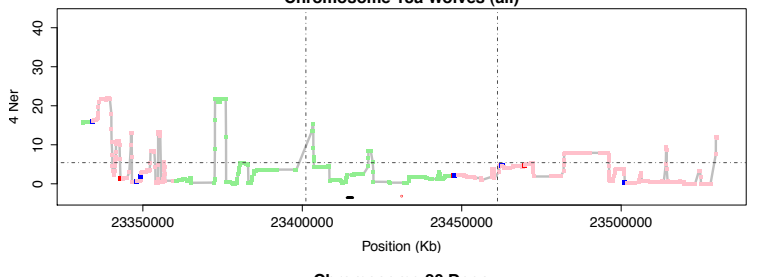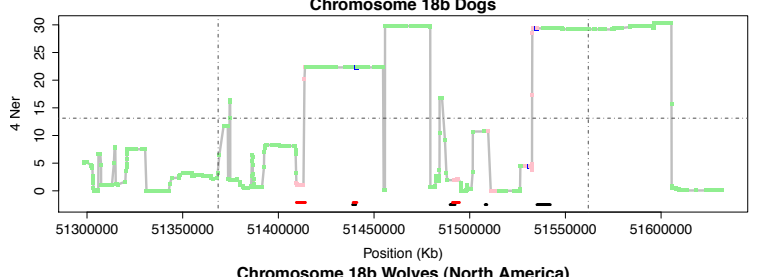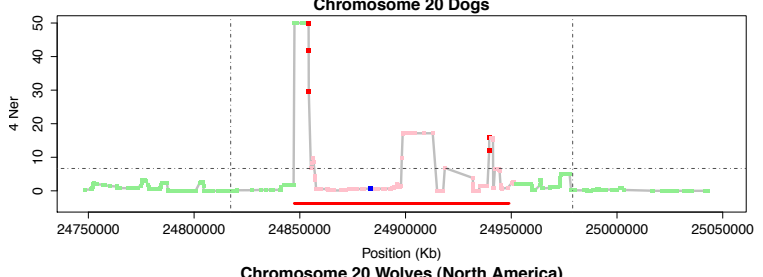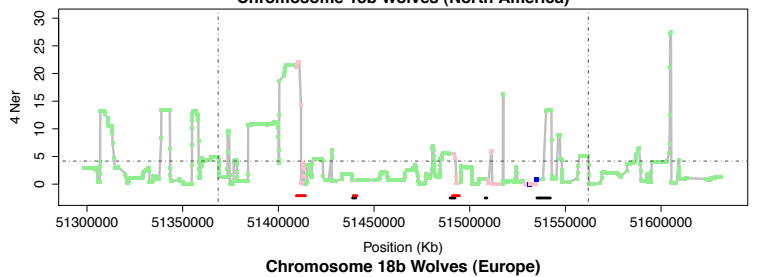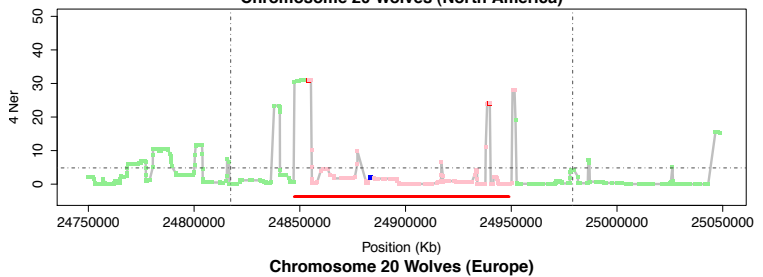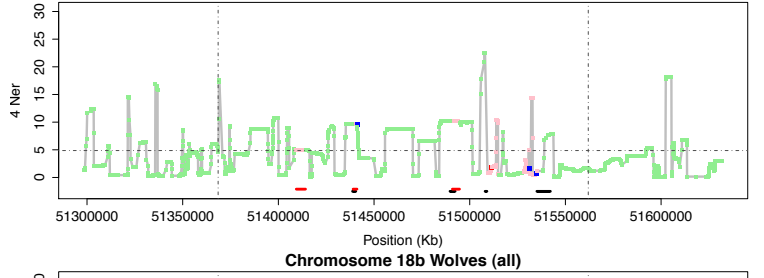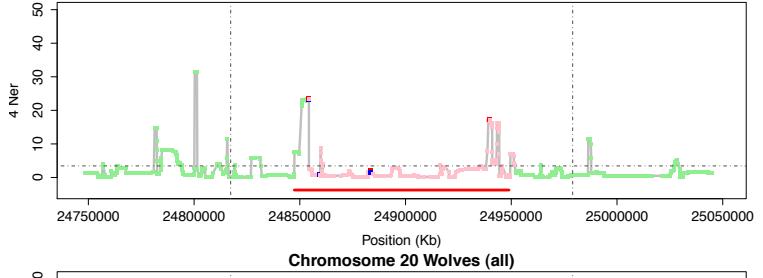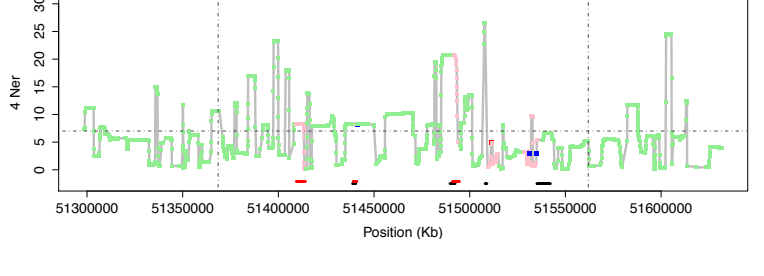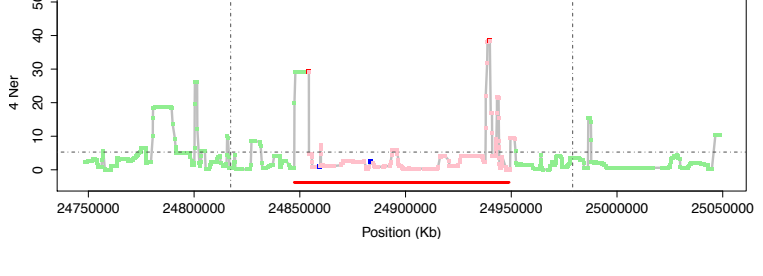

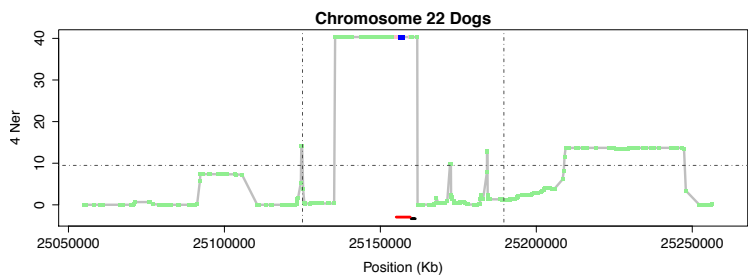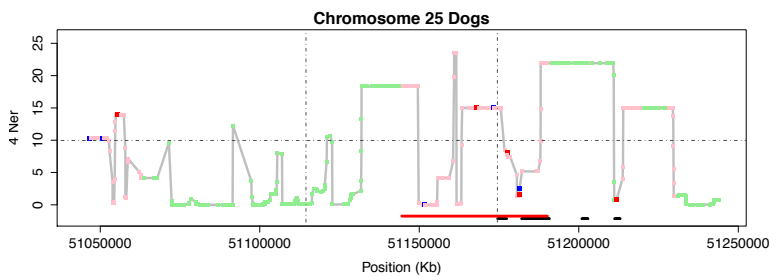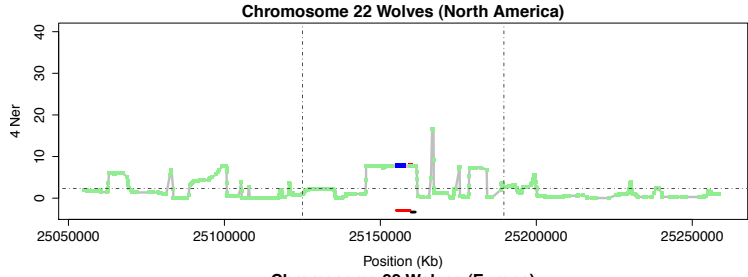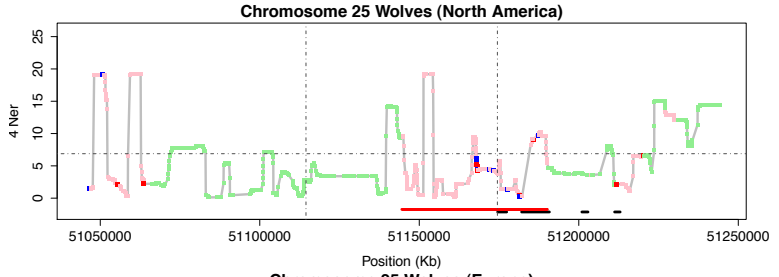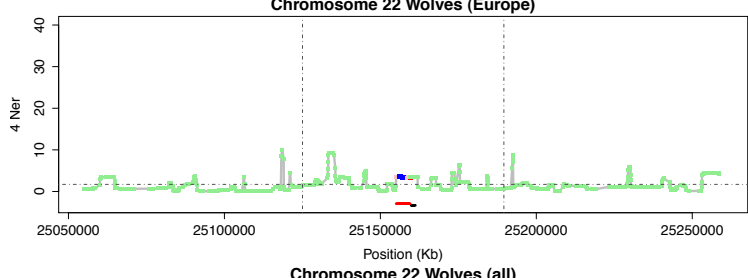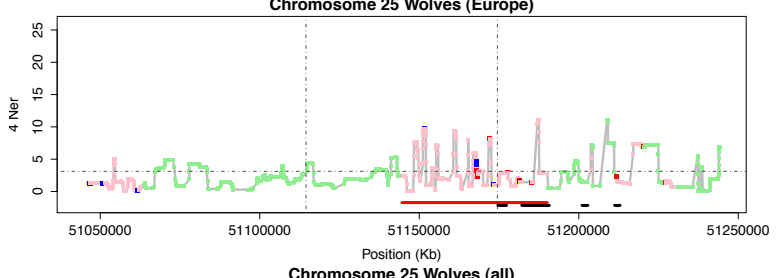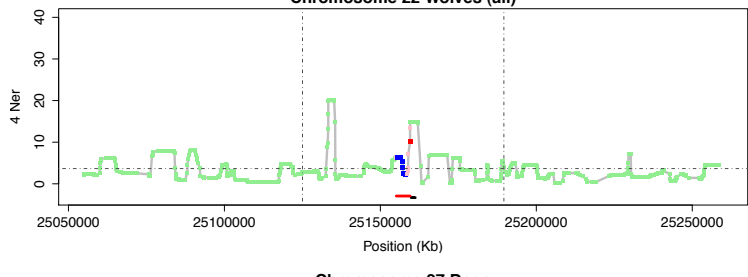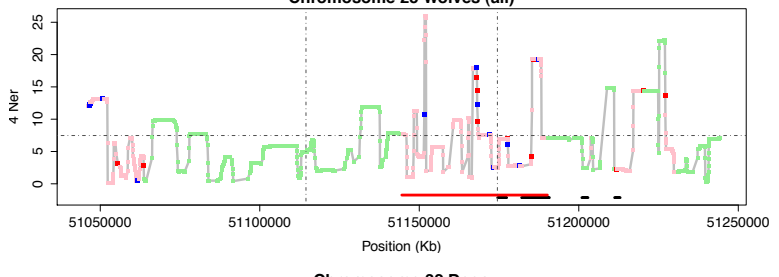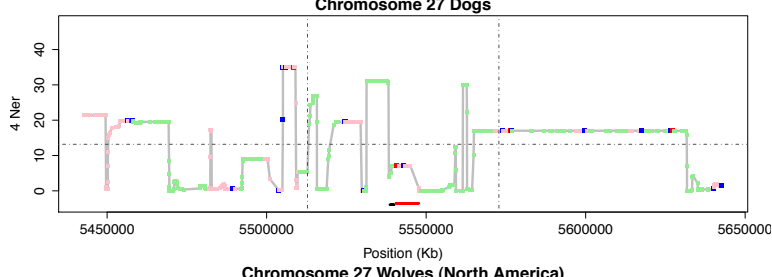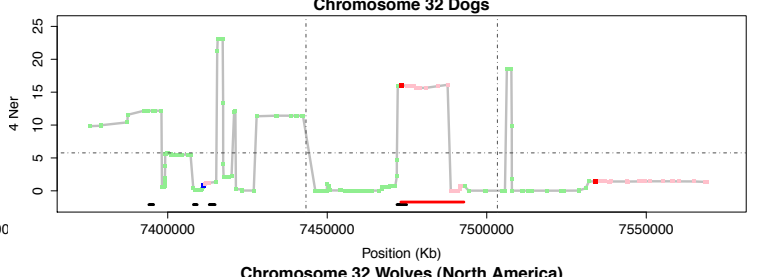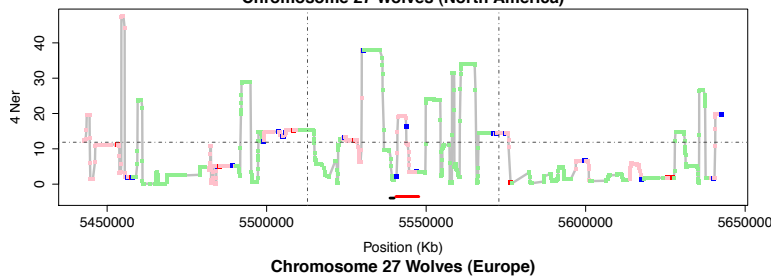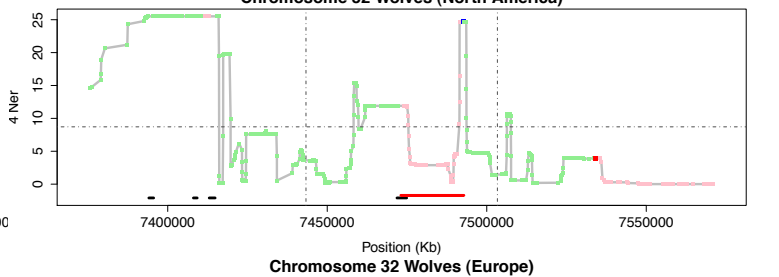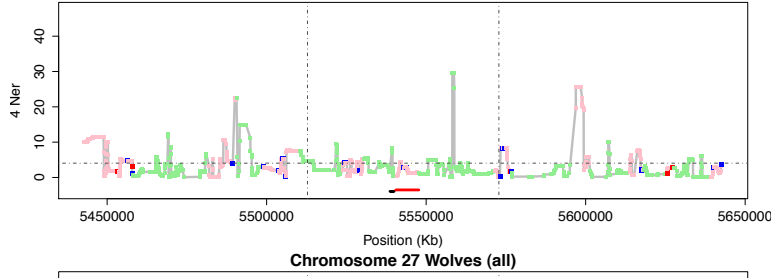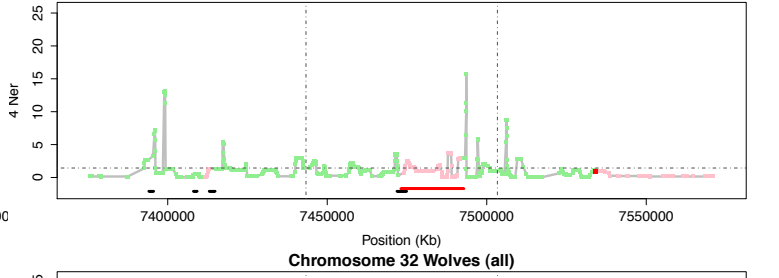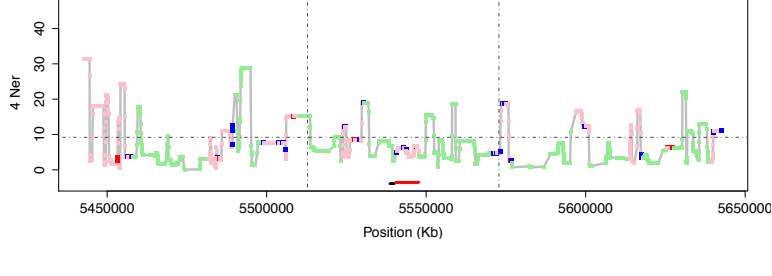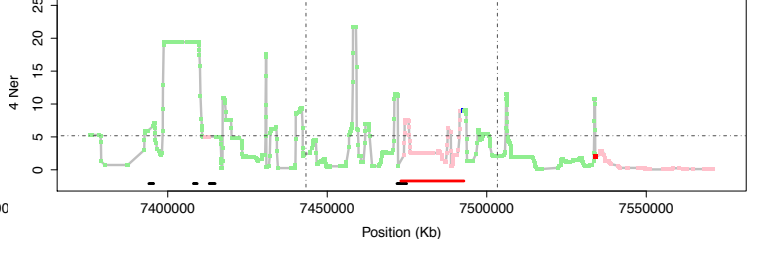

Supplement: supp_msu322_MunozFuentesEtAl_supplementary_withFigs.pdf [file supp_msu322_MunozFuentesEtAl_supplementary_withFigs.pdf]
